# Supplementary material for: A wide range of chromosome numbers result from unreduced gamete production in Brassica juncea × B. napus (AABC) interspecific hybrids
Source: Research Square preprint supplement (doi:10.21203/rs.3.rs-4978520/v1), 2024-10-04
Supplement: Supplementary file 1 [file 73de55a15ff980c2113aefe2.pdf]

A wide range of chromosome numbers result from  
unreduced gamete production in *Brassica juncea* × *B.*  
*napus* (AABC) interspecific hybrids

Charles Addo Nyarko<sup>1,2</sup>, Elvis Katche<sup>2</sup>, Mariana Baez<sup>1</sup>, Zhenling Lv<sup>1,2</sup>, Annaliese S. Mason<sup>1,2,\*</sup>

<sup>1</sup> Plant Breeding Department, University of Bonn, Kirschallee 1, 53115, Bonn, Germany

<sup>2</sup> Plant Breeding Department, Justus Liebig University, Heinrich-Buff-Ring 26-32, 35392, Giessen,  
Germany

\*corresponding author: annaliese.mason@uni-bonn.de

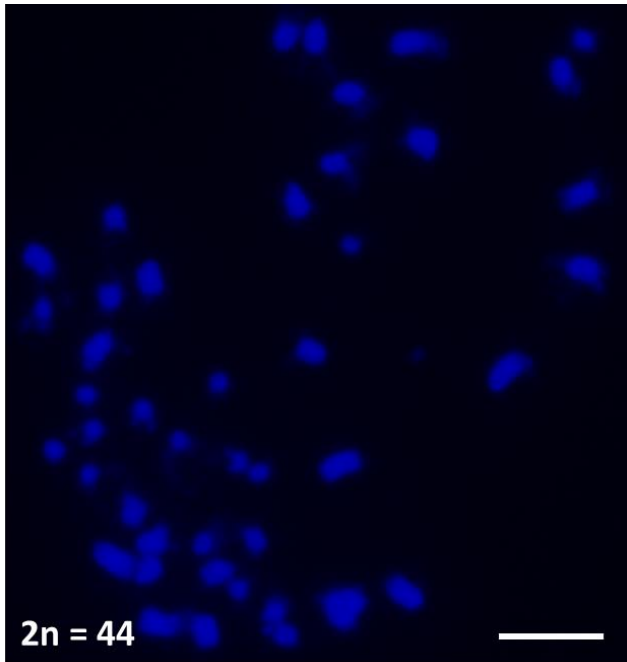

**Supplementary Figure 1: Mitotic metaphase chromosome spreads from the  $S_1$  parental hybrid resulting from the cross *Brassica juncea*  $\times$  *B. napus* followed by one generation of self-pollination. Predicted chromosome number for a first-generation interspecific hybrid is  $2n = 37$  (AABC) chromosomes. Bar = 10  $\mu\text{m}$ .**

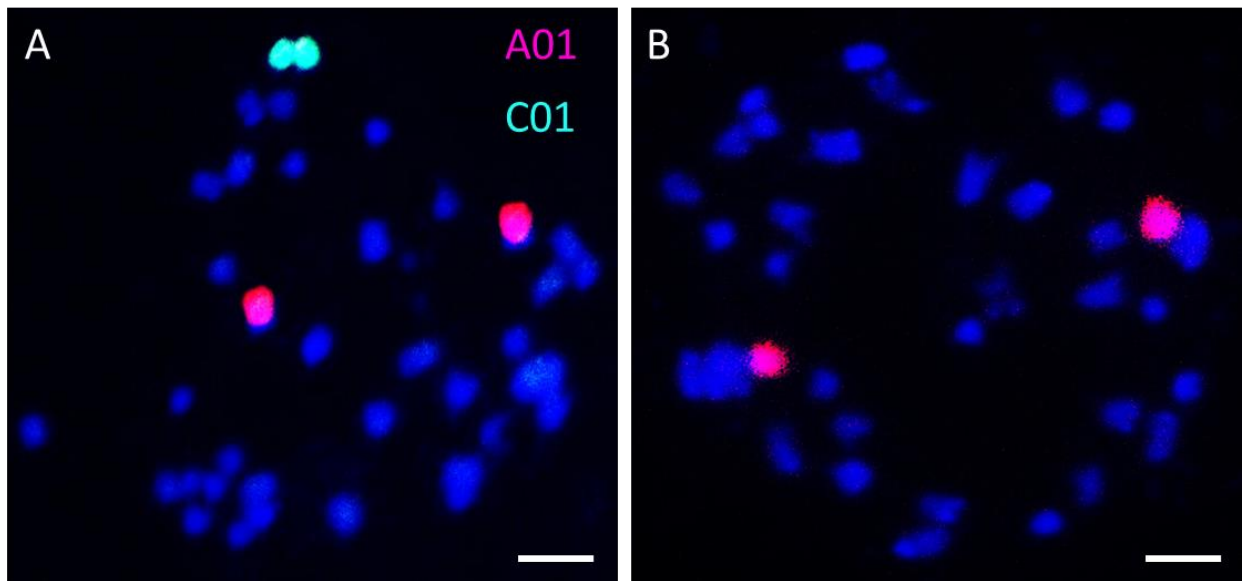

**Supplementary Figure 2: Identification of the number of copies of chromosomes A01 and C1 in the interspecific hybrids resulting from the cross *Brassica juncea* × *B. napus* followed by two generations of self-pollination. A)** Parental *Brassica napus* with 2 A01 chromosomes (red) and 2 C1 chromosomes (Turquoise). **B)** Parental *Brassica juncea* with 2 A01 chromosomes. Chromosomes are counterstained with DAPI (blue). Bars = 10µm.

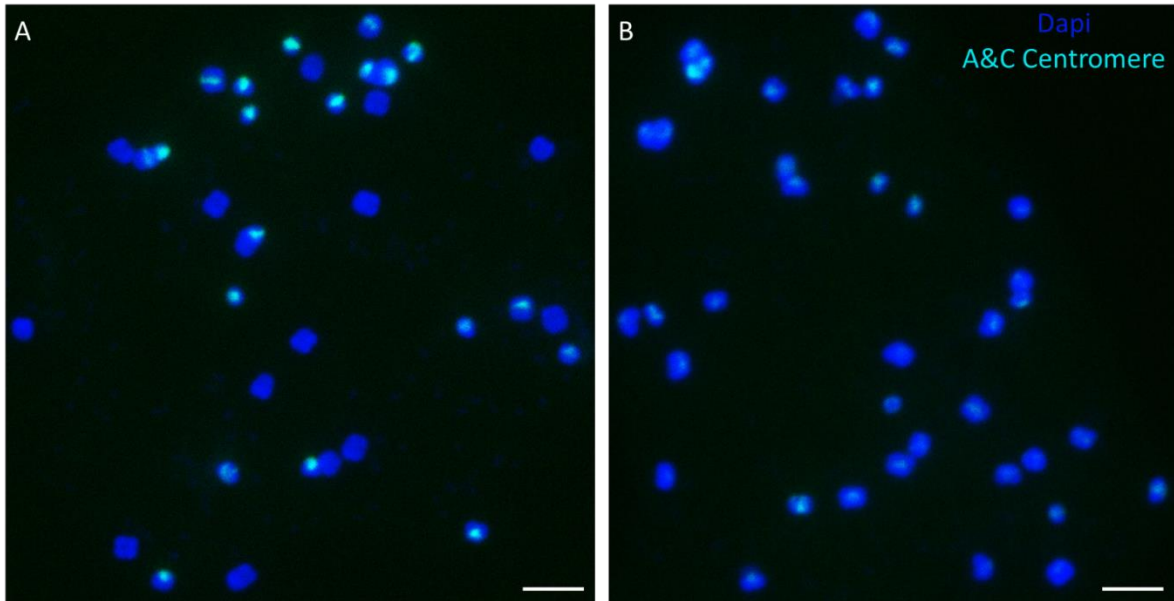

**Supplementary Figure 3: Identification of the A and C-genome chromosomes (green) with *Brassica* centromere probes CentBr1 and CentBr2 in the parental *Brassica juncea* (A) and *B. napus* (B). Chromosomes are counterstained with DAPI (blue). Bars = 10μm.**

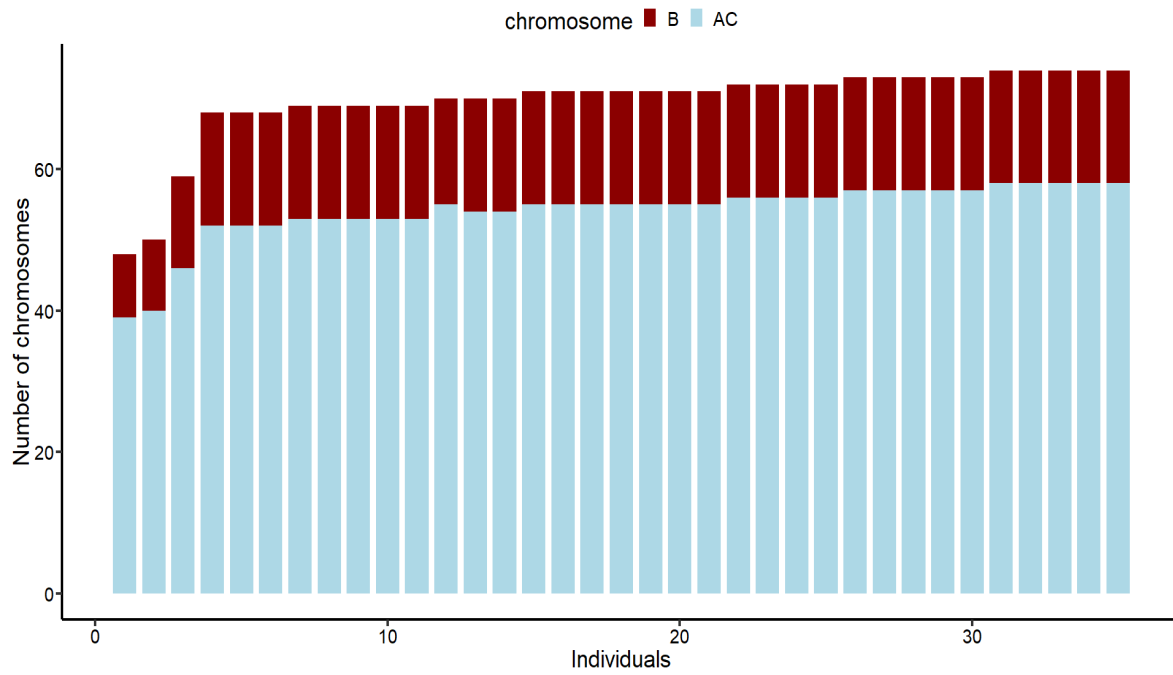

**Supplementary Figure 4: Distribution of the number of B and AC-genome chromosomes in the interspecific hybrids resulting from the cross *Brassica juncea* × *B. napus* followed by two generations of self-pollination.**
